# Supplementary material for: Adult Atopic Dermatitis with Comorbid Atopic Disease is Associated with Increased Risk of Infections: A Population-Based Cross-Sectional Study
Source: Springer Nature journal article supplement (doi:10.1007/s13555-017-0172-7), 2017-01-30
Supplement: MOESM1 [file 12028066]

**Supplementary Table 1. NHIS questions corresponding to disease status and outcomes**

| <b>Variable</b>                       | <b>NHIS Dataset</b>  | <b>Corresponding NHIS Question(s)</b>                                                                          |
|---------------------------------------|----------------------|----------------------------------------------------------------------------------------------------------------|
| Atopic dermatitis                     | NHIS 2010            | During the past 12 months, have you had dermatitis, eczema, or any other red, inflamed skin rash?              |
| Atopic dermatitis                     | NHIS 2012            | During the past 12 months, have you had eczema or any kind of skin allergy?                                    |
| Allergic rhinitis                     | NHIS 2010, NHIS 2012 | During the past 12 months, have you been told by a doctor or other health professional that you had hay fever? |
| Asthma                                | NHIS 2010, NHIS 2012 | Have you ever been told by a doctor or other health professional that you had asthma?                          |
| Gastrointestinal illness              | NHIS 2010            | Did you have a stomach or intestinal illness with vomiting or diarrhea that started during those two weeks?    |
| Head or chest cold                    | NHIS 2010            | Did you have a head cold or chest cold that started during those two weeks?                                    |
| Head or chest cold                    | NHIS 2012            | During the past 12 months, have you had head/chest cold, past 12 months?                                       |
| Infectious disease                    | NHIS 2012            | During the past 12 months, have you had infectious diseases or problems of the immune system?                  |
| Pneumonia/ influenza                  | NHIS 2012            | Have you ever been told by a doctor or other health professional that you had influenza or pneumonia?          |
| Sinusitis                             | NHIS 2010, NHIS 2012 | During the past 12 months, have you been told by a doctor or other health professional that you had sinusitis? |
| Strep throat/ tonsillitis             | NHIS 2012            | Have you ever been told by a doctor or other health professional that you had strep throat or tonsillitis?     |
| Chronic obstructive pulmonary disease | NHIS 2010, NHIS 2012 | Have you ever been told you have chronic obstructive pulmonary disease?                                        |
| Diabetes mellitus                     | NHIS 2010, NHIS 2012 | Have you ever been told you have diabetes?                                                                     |
| Hypertension                          | NHIS 2010, NHIS 2012 | Have you ever been told you have hypertension?                                                                 |
| Malignancy                            | NHIS 2010, NHIS 2012 | Have you ever been told by a doctor that you have cancer?                                                      |

Abbreviations: NHIS, National Health Interview Survey

**Supplementary Table 2. NHIS 2010 Population Demographics**

| <b>Variable</b>                | <b>No Atopic dermatitis<br/>(n=24208)</b> | <b>Atopic dermatitis<br/>(n=2607)</b> | <b>P-<br/>value</b> |
|--------------------------------|-------------------------------------------|---------------------------------------|---------------------|
| Age, y, (95% CI)               | 46.0 (45.7-46.4)                          | 47.5 (46.6-48.4)                      | 0.003               |
| Sex, no. (%)                   |                                           |                                       |                     |
| Female                         | 13405 (51.1%)                             | 1578 (56.7%)                          | <0.001              |
| Male                           | 10803 (48.9%)                             | 1029 (43.3%)                          |                     |
| Race/Ethnicity, no. (%)        |                                           |                                       |                     |
| White                          | 17874 (80.6%)                             | 2016 (83.7%)                          |                     |
| Black                          | 4171 (12.4%)                              | 347 (9.2%)                            |                     |
| American Indian                | 191 (0.8%)                                | 22 (0.6%)                             | <0.001              |
| Asian                          | 1598 (4.9%)                               | 152 (4.3%)                            |                     |
| Other                          | 374 (1.3%)                                | 70 (2.2%)                             |                     |
| Hispanic origin, no. (%)       |                                           |                                       |                     |
| Yes                            | 4786 (14.6%)                              | 308 (8.2%)                            | <0.001              |
| No                             | 19422 (85.4%)                             | 2299 (91.8%)                          |                     |
| Body mass index, no. (95% CI)  | 29.6 (29.4-29.8)                          | 30.3 (29.7-30.9)                      | 0.05                |
| Smoking status, no. (%)        |                                           |                                       |                     |
| Current smoker                 | 4601 (19.4%)                              | 516 (19.1%)                           |                     |
| Former smoker                  | 5005 (21.1%)                              | 692 (26.5%)                           | <0.001              |
| Never smoker                   | 14602 (59.5%)                             | 1399 (54.4%)                          |                     |
| Diabetes, no. (%)              |                                           |                                       |                     |
| Yes                            | 2384 (8.8%)                               | 336 (11.8%)                           |                     |
| No                             | 21512 (90.0%)                             | 2233 (87.0%)                          | <0.001              |
| Borderline                     | 312 (1.2%)                                | 38 (1.2%)                             |                     |
| Hypertension, no. (%)          |                                           |                                       |                     |
| Yes                            | 7690 (29.6%)                              | 1019 (36.0%)                          | <0.001              |
| No                             | 16518 (70.4%)                             | 1588 (64.0%)                          |                     |
| COPD, no. (%)                  |                                           |                                       |                     |
| Yes                            | 426 (1.7%)                                | 96 (3.1%)                             | <0.001              |
| No                             | 23782 (98.3%)                             | 2511 (96.9%)                          |                     |
| History of malignancy, no. (%) |                                           |                                       |                     |
| Yes                            | 1927 (7.8%)                               | 354 (13.9%)                           | <0.001              |
| No                             | 22281 (92.2%)                             | 2253 (86.1%)                          |                     |
| Asthma, no. (%)                |                                           |                                       |                     |
| Yes                            | 2737 (11.6%)                              | 561 (25.0%)                           | <0.001              |
| No                             | 21471 (88.4%)                             | 2046 (75.0%)                          |                     |
| Allergic rhinitis, no. (%)     |                                           |                                       |                     |
| Yes                            | 1595 (6.9%)                               | 397 (15.7%)                           | <0.001              |
| No                             | 22613 (93.1%)                             | 2210 (84.3%)                          |                     |

Abbreviations: CI, confidence interval; COPD, chronic obstructive pulmonary disease; NHIS, National Health Interview Survey; No., number; y, year.

Population demographics of NHIS 2010 adult sample. Atopic dermatitis was compared to those without atopic dermatitis. Significant differences were determined using Student's t-test for continuous variables and chi-square test with continuity correction for categorical variables. Those variables with a p-value <0.05 were deemed significant.

**Supplementary Table 3. NHIS 2012 Population Demographics**

| <b>Variable</b>                | <b>No Atopic dermatitis<br/>(n=31493)</b> | <b>Atopic dermatitis<br/>(n=2425)</b> | <b>P-<br/>value</b> |
|--------------------------------|-------------------------------------------|---------------------------------------|---------------------|
| Age, y, (95% CI)               | 46.5 (46.2-46.8)                          | 46.8 (45.9-47.7)                      | 0.496               |
| Sex, no. (%)                   |                                           |                                       |                     |
| Female                         | 17344 (51.1%)                             | 1553 (61.2%)                          | <0.001              |
| Male                           | 14149 (48.9%)                             | 872 (38.8%)                           |                     |
| Race/Ethnicity, no. (%)        |                                           |                                       |                     |
| White                          | 23687 (80.2%)                             | 1847 (81.2%)                          |                     |
| Black                          | 4938 (12.1%)                              | 311 (10.1%)                           |                     |
| American Indian                | 314 (0.8%)                                | 29 (1.0%)                             | <0.001              |
| Asian                          | 1997 (5.4%)                               | 148 (5.0%)                            |                     |
| Other                          | 557 (1.6%)                                | 90 (2.8%)                             |                     |
| Hispanic origin, no. (%)       |                                           |                                       |                     |
| Yes                            | 5473 (15.2%)                              | 321 (11.6%)                           | <0.001              |
| No                             | 26020 (84.8%)                             | 2104 (88.4%)                          |                     |
| Body mass index, no. (95% CI)  | 30.1 (29.9, 30.3)                         | 30.9 (30.1, 31.7)                     | 0.05                |
| Smoking status, no. (%)        |                                           |                                       |                     |
| Current smoker                 | 5849 (18.0%)                              | 525 (19.5%)                           |                     |
| Former smoker                  | 6862 (21.8%)                              | 639 (26.1%)                           | <0.001              |
| Never smoker                   | 18782 (60.2%)                             | 1261 (54.4%)                          |                     |
| Diabetes, no. (%)              |                                           |                                       |                     |
| Yes                            | 3141 (8.8%)                               | 304 (11.8%)                           |                     |
| No                             | 27927 (90.1%)                             | 2064 (86.1%)                          | <0.001              |
| Borderline                     | 425 (1.1%)                                | 57 (2.1%)                             |                     |
| Hypertension, no. (%)          |                                           |                                       |                     |
| Yes                            | 10111 (29.1%)                             | 939 (36.5%)                           | <0.001              |
| No                             | 21382 (70.9%)                             | 1486 (63.5%)                          |                     |
| COPD, no. (%)                  |                                           |                                       |                     |
| Yes                            | 926 (2.6%)                                | 153 (6.2%)                            | <0.001              |
| No                             | 30567 (97.4%)                             | 2272 (93.8%)                          |                     |
| History of malignancy, no. (%) |                                           |                                       |                     |
| Yes                            | 2729 (8.2%)                               | 303 (11.5%)                           | <0.001              |
| No                             | 28764 (91.8%)                             | 2122 (88.5%)                          |                     |
| Asthma, no. (%)                |                                           |                                       |                     |
| Yes                            | 3679 (11.6%)                              | 607 (25.0%)                           | <0.001              |
| No                             | 21471 (88.4%)                             | 1818 (75.0%)                          |                     |
| Allergic rhinitis, no. (%)     |                                           |                                       |                     |
| Yes                            | 2177 (7.0%)                               | 348 (14.0%)                           | <0.001              |
| No                             | 29316 (93.0%)                             | 2077 (86.0%)                          |                     |

Abbreviations: CI, confidence interval; COPD, chronic obstructive pulmonary disease; NHIS, National Health Interview Survey; No., number; y, year.

Population demographics of NHIS 2012 adult sample. Atopic dermatitis was compared to those without atopic dermatitis. Significant differences were determined using Student's t-test for continuous variables and chi-square test with continuity correction for categorical variables. Those variables with a p-value <0.05 were deemed significant.
